# Supplementary material for: Diagnostic value of contrast-enhanced ultrasound in preoperative evaluation of lymph node metastasis and thyroid nodules in papillary thyroid carcinoma: a single-center retrospective study
Source: Research Square preprint supplement (doi:10.21203/rs.3.rs-2965223/v1), 2023-05-31
Supplement: Supplementary file 1 [file 0612ce8844456d7081b7a6d2.xlsx]

## Sheet: ptc
Patients	gender	≥55 years	TI-RADS	Bilaterality	PTMC	hashimoto's thyroiditis	LNM	CLNM	lymph node dissection	LLNM	L2	L3	L4	L5	L6	R2	R3	R4	R5	R6	ceus:cn1	region of LNM	size of LNM（mm)	L2	L3	L4	L5	L6	R2	R3	R4	R5	R6
Case 1	0	1		1	1	0	1	1	2	1		0	0		0		0	1		1	1	2	1		1
Case 2	0	1	5	0	0	0	1	1	2	1	1	1	1		1						1	2	1			1
Case 3	1	0		0	0	0	1	1	2	1	0	0	1		1						1	2	1			1
Case 4	1	0	5	0	1	0	1	1	2	2			0		1						1	2	1			1
Case 5	1	0	4b	0	1	0	1	1	2	2							0	0		1	1	2	1								1
Case 6	0	0	4b	0	1	0	1	1	2	2					1		0	0		1	1	2	1								1
Case 7	0	0	4a	0	1	0	1	1	1											1	1	2	1
Case 8	1	1		1	1	0	1	1	1						0					1	1	2	1			1
Case 9	0	0	5	1	1	0	1	1	2	1		0			0	1	0	0		1	1	1	1										1
Case 10	1	0	4c	0	1	0	1	1	2	1					1	1	0	0		1	1	1	1										1
Case 11	0	0	4c	1	1	0	1	1	2	1	1	0	0		1	0	0	0		1	1	1	1					1
Case 12	0	0		1	1	0	1	1	2	1	1	1	0		1					0	1	1	1					1
Case 13	0	0		1	0	0	1	1	2	1	0	0	1		1					0	1	1	1					1
Case 14	0	0	5	0	1	0	1	1	2	2							0	0		1	1	1	1										1
Case 15	1	0	5	0	1	0	1	1	2	2						0	0	0		1	1	1	1										1
Case 16	0	0	5	0	1	0	1	1	2	2						0	0	0		1	1	1	1										1
Case 17	0	0	4c	0	1	0	1	1	2	2							0	0		1	1	1	1										1
Case 18	0	0	5	0	0	0	1	1	2	2	0	0	0		1						1	1	1					1
Case 19	0	1	4b	1	0	0	1	1	2	2					1						1	1	1										1
Case 20	0	0	4c	0	0	0	1	1	2	2					0	0	0	0		1	1	1	1										1
Case 21	0	1		0	0	0	1	1	2	2	0	0	0		1						1	1	1					1
Case 22	1	0	4a	1	1	0	1	1	1											1	1	1	1										1
Case 23	0	0	4b	0	1	0	1	1	1						1						1	1	1					1
Case 24	1	0	4c	1	1	0	1	1	1						1						1	1	1					1
Case 25	1	0	4c	0	1	0	1	1	1											1	1	1	1										1
Case 26	1	0		0	1	0	1	1	1											1	1	1	1										1
Case 27	0	0		1	1	0	1	1	1						1						1	1	1
Case 28	0	0	4b	0	0	0	1	1	1						1					0	1	1	1					1
Case 29	0	1	4b	0	0	0	1	1	1						1						1	1	1					1
Case 30	0	1	4c	0	0	0	1	1	1											1	1	1	1										1
Case 31	0	0		1	0	0	1	1	1											1	1	1	1										1
Case 32	0	0		0	0	0	1	1	1						1						1	1	1					1
Case 33	0	1	5	0	1	0	1	1	1											1	1		1								0
Case 34	0	0		1	1	1	1	1	2	2					0		0			1	1	1	1					1
Case 35	0	0		0	1	1	1	1	1						1					1	1	1	1					1
Case 36	1	0		0	0	1	1	1	1											1	1	1	1										1
Case 37	1	0	5	1	1	0	1	1	2	1					0	0	1	0		1	1	2	2								1
Case 38	1	0		0	1	0	1	1	2	1					0		1	1		1	1	2	2								1
Case 39	0	0		1	1	0	1	1	2	1		1	0		1					0	1	2	2			1
Case 40	1	0		0	1	0	1	1	2	1						0	1	1		1	1	2	2								1
Case 41	0	0	5	0	0	0	1	1	2	1					0		1	1		1	1	2	2								1
Case 42	0	0	5	0	0	0	1	1	2	1						1	1	0		1	1	2	2							1
Case 43	0	0	5	0	0	0	1	1	2	1	0	1	1		1						1	2	2			1
Case 44	0	0	5	0	0	0	1	1	2	1						1	1	0		1	1	2	2							1
Case 45	1	0	5	0	0	0	1	1	2	1							1	1		1	1	2	2								1
Case 46	0	0	5	1	0	0	1	1	2	1	1	1	1		1	1	0	1		1	1	2	2		1
Case 47	0	1	5	0	0	0	1	1	2	1	1	0	0		1					1	1	2	2			1
Case 48	0	0	5	0	0	0	1	1	2	1						0	1	1		1	1	2	2								1
Case 49	0	0	4a	0	0	0	1	1	2	1	1	0	0		1					0	1	2	2		1
Case 50	0	0	4a	0	0	0	1	1	2	1							1	1		1	1	2	2			1
Case 51	1	0	4b	0	0	0	1	1	2	1	1	1	0		1		1	1		1	1	2	2		1
Case 52	1	0	4b	0	0	0	1	1	2	1						1	1	1		1	1	2	2								1
Case 53	0	0	4b	1	0	0	1	1	2	1					1		1	0		0	1	2	2							1
Case 54	0	0		0	0	0	1	1	2	1							1	1		1	1	2	2								1
Case 55	0	0		0	0	0	1	1	2	1					0	1	1	1		1	1	2	2							1
Case 56	0	0		0	0	0	1	1	2	1		1	1		1						1	2	2		1
Case 57	0	0		1	0	0	1	1	2	1		1	1		1					1	1	2	2			1
Case 58	0	0		1	0	0	1	1	2	1					0		0	1		1	1	2	2								1
Case 59	0	1		1	0	0	1	1	2	1	1	1	1		1					1	1	2	2		1
Case 60	1	0	4b	0	1	0	1	1	2	2		0	0		1						1	2	2			1
Case 61	0	0	4b	0	1	0	1	1	2	2							0	0		1	1	2	2								1
Case 62	0	0	4c	0	1	0	1	1	2	2	0	0	0		1						1	2	2			1
Case 63	0	0	5	0	0	0	1	1	2	2							0	0		1	1	2	2			1
Case 64	0	0	5	0	0	0	1	1	2	2						0	0	0		1	1	2	2								1
Case 65	1	0	4b	1	0	0	1	1	2	2					1	0	0	0		1	1	2	2								1
Case 66	0	0	4b	0	0	0	1	1	2	2					0	0	0	0		1	1	2	2							1
Case 67	1	1		0	0	0	1	1	2	2	0	0	0		1						1	2	2			1
Case 68	1	0	5	0	1	0	1	1	1						1						1	2	2		1
Case 69	1	0	5	0	1	0	1	1	1											1	1	2	2								1
Case 70	0	1	5	0	1	0	1	1	1											1	1	2	2								1
Case 71	1	0	4a	0	0	0	1	1	1						1					1	1	2	2								1
Case 72	0	0	5	1	1	0	1	1	2	1					0		0	1		1	1	1	2										1
Case 73	1	0	5	0	1	0	1	1	2	1	1	0	0		1						1	1	2										1
Case 74	1	1	4a	0	1	0	1	1	2	1	1	1	1		1						1	1	2					1
Case 75	0	0	4b	0	1	0	1	1	2	1					1	0	1	0		1	1	1	2										1
Case 76	0	0	4b	0	1	0	1	1	2	1			1		1						1	1	2										1
Case 77	0	0		0	1	0	1	1	2	1					1		1	0		1	1	1	2										1
Case 78	0	1		0	1	0	1	1	2	1						0	0	1		1	1	1	2										1
Case 79	1	0	5	0	0	0	1	1	2	1						1	0	0		1	1	1	2					1
Case 80	0	0	5	0	0	0	1	1	2	1						1	1	1		1	1	1	2										1
Case 81	0	0	5	0	0	0	1	1	2	1	1	0	1		1						1	1	2					1					1
Case 82	0	0	5	1	0	0	1	1	2	1		1	0		0		1	0		1	1	1	2					1
Case 83	0	0	4a	0	0	0	1	1	2	1	0	1	0		1						1	1	2					1
Case 84	1	0	4a	1	0	0	1	1	2	1					1		1	1		1	1	1	2					1
Case 85	0	0	4a	0	0	0	1	1	2	1							0	1		1	1	1	2										1
Case 86	0	0	4b	0	0	0	1	1	2	1						1	1	1		1	1	1	2										1
Case 87	0	0	4b	1	0	0	1	1	2	1						0	1	1		1	1	1	2										1
Case 88	1	0	4c	0	0	0	1	1	2	1						1	0	0		1	1	1	2										1
Case 89	0	0	4c	1	0	0	1	1	2	1		1	1		1		0			1	1	1	2										1
Case 90	0	0	4c	1	0	0	1	1	2	1		1	1		1					0	1	1	2					1
Case 91	0	0		0	0	0	1	1	2	1		1	1		1						1	1	2					1
Case 92	0	0		0	0	0	1	1	2	1						0	1	1		1	1	1	2										1
Case 93	0	0		0	0	0	1	1	2	1	1	1	1		1			0		0	1	1	2					1
Case 94	0	1		0	0	0	1	1	2	1	1	1	1		1						1	1	2					1
Case 95	1	0	5	0	1	0	1	1	2	2							0	0		1	1	1	2										1
Case 96	1	0	5	1	1	0	1	1	2	2					1	0	0	0		1	1	1	2										1
Case 97	1	0	5	0	1	0	1	1	2	2							0	0		1	1	1	2										1
Case 98	0	0	5	0	1	0	1	1	2	2		0			1						1	1	2					1
Case 99	0	0	4a	0	1	0	1	1	2	2							0	0		1	1	1	2										1
Case 100	1	0	4a	0	1	0	1	1	2	2					1		0	0		1	1	1	2										1
Case 101	0	0	4b	0	1	0	1	1	2	2		0	0		1					1	1	1	2					1
Case 102	0	0	4c	1	1	0	1	1	2	2					1		0	0		1	1	1	2					1
Case 103	0	0	4c	0	1	0	1	1	2	2	0	0	0		1						1	1	2					1
Case 104	0	1	4c	1	1	0	1	1	2	2					0		0	0		1	1	1	2										1
Case 105	0	0		0	1	0	1	1	2	2						0	0	0		1	1	1	2										1
Case 106	0	0		0	1	0	1	1	2	2							0			1	1	1	2										1
Case 107	0	0		0	1	0	1	1	2	2	0	0	0		1						1	1	2					1
Case 108	0	0	4b	1	0	0	1	1	2	2		0			1					0	1	1	2					1
Case 109	0	0	4b	1	0	0	1	1	2	2	0	0	0		1					1	1	1	2										1
Case 110	0	0	4b	0	0	0	1	1	2	2	0	0	0		1						1	1	2					1
Case 111	1	0	4c	0	0	0	1	1	2	2	0	0	0		1						1	1	2					1
Case 112	0	0		0	0	0	1	1	2	2		0	0		1					1	1	1	2										1
Case 113	0	0		0	0	0	1	1	2	2		0			1						1	1	2					1
Case 114	0	0		0	0	0	1	1	2	2					1		0	0		1	1	1	2										1
Case 115	1	0	5	0	1	0	1	1	1						1						1	1	2					1
Case 116	0	0	5	0	1	0	1	1	1						1						1	1	2					1
Case 117	0	0	4a	0	1	0	1	1	1											1	1	1	2										1
Case 118	0	0	4b	0	1	0	1	1	1						1						1	1	2					1
Case 119	0	0	4c	1	1	0	1	1	1						0					1	1	1	2										1
Case 120	0	0	4c	1	1	0	1	1	1						1					0	1	1	2										1
Case 121	0	0		1	1	0	1	1	1						1					1	1	1	2										1
Case 122	0	0	5	0	0	0	1	1	1											1	1	1	2										1
Case 123	0	1	5	1	0	0	1	1	1						0					1	1	1	2										1
Case 124	0	0	5	0	0	0	1	1	1											1	1	1	2										1
Case 125	1	0	4b	0	0	0	1	1	1											1	1	1	2										1
Case 126	0	0		0	1	0	1	1	2	2							0			1	0		2							0
Case 127	0	0	4b	0	1	1	1	1	2	1						1	0	0		1	1	2	2								1
Case 128	0	1	4b	0	1	1	1	1	2	1						0	0	1		1	1	2	2		2						1
Case 129	0	0	5	0	0	1	1	1	2	1						1	0	1		1	1	2	2								1
Case 130	0	0	4b	0	0	1	1	1	2	1					0		1	0		1	1	2	2							1
Case 131	0	0	4b	0	0	1	1	1	2	1						0	1	0		1	1	2	2								1
Case 132	1	0	4b	1	0	1	1	1	2	1					1	0	1	0		1	1	2	2								1
Case 133	0	0		0	0	1	1	1	2	1	1	1	0		1					1	1	2	2			1
Case 134	0	0		1	0	1	1	1	2	1	0	1	0		1	0	1	1		1	1	2	2							1
Case 135	0	1		0	0	1	1	1	2	1					0	0	0	1		1	1	2	2								1
Case 136	0	0	5	0	1	1	1	1	2	2		0	0		1					0	1	2	2			1
Case 137	0	1	4b	1	1	1	1	1	2	2					0		0			1	1	2	2								1
Case 138	1	0	5	0	0	1	1	1	2	2						0	0	0		1	1	2	2			1
Case 139	0	0	4b	0	0	1	1	1	2	2	0	0	0		1						1	2	2			1
Case 140	1	0		0	0	1	1	1	1											1	1	2	2								1
Case 141	1	0	5	1	1	1	1	1	2	1		0	0		1		0	1		1	1	1	2					1
Case 142	0	1	5	0	1	1	1	1	2	1						0	1	0		1	1	1	2										1
Case 143	0	0	4a	0	1	1	1	1	2	1	0	0	1		1					0	1	1	2					1
Case 144	1	0	4b	0	1	1	1	1	2	1	0	1	1		1						1	1	2					1
Case 145	0	0	4c	0	1	1	1	1	2	1					0	0	1			1	1	1	2										1
Case 146	0	0		0	1	1	1	1	2	1					0		1	0		1	1	1	2										1
Case 147	0	0		1	1	1	1	1	2	1	0	1	0		1					0	1	1	2					1
Case 148	0	0	5	1	0	1	1	1	2	1					0		1	1		1	1	1	2										1
Case 149	0	0	5	0	0	1	1	1	2	1							1			1	1	1	2										1
Case 150	0	0	5	1	0	1	1	1	2	1		1	0		1		0	0		1	1	1	2										1
Case 151	1	1	5	0	0	1	1	1	2	1						0	1	0		1	1	1	2										1
Case 152	0	0	4b	0	0	1	1	1	2	1	0	1	1		1						1	1	2					1
Case 153	0	0		0	0	1	1	1	2	1						1	1	1		1	1	1	2										1
Case 154	1	1		0	0	1	1	1	2	1	1	1	0		1					0	1	1	2
Case 155	1	0		0	1	1	1	1	2	2		0	0		1						1	1	2					1
Case 156	0	0	5	0	0	1	1	1	2	2						0	0	0		1	1	1	2										1
Case 157	0	0	5	0	0	1	1	1	2	2		0	0		1						1	1	2					1
Case 158	0	0	4b	0	0	1	1	1	2	2					0		0	0		1	1	1	2										1
Case 159	0	0	4c	0	0	1	1	1	2	2							0	0		1	1	1	2										1
Case 160	0	0	5	0	1	1	1	1	1						1						1	1	2					1
Case 161	0	1	5	0	1	1	1	1	1						1						1	1	2					1					1
Case 162	1	0	4a	0	1	1	1	1	1						1						1	1	2					1
Case 163	0	0	4c	0	1	1	1	1	1						1						1	1	2					1
Case 164	0	0		1	1	1	1	1	1						1					0	1	1	2					1
Case 165	0	0		0	1	1	1	1	1											1	1	1	2										1
Case 166	1	0		0	1	1	1	1	1						1						1	1	2					1
Case 167	0	0	4a	0	0	1	1	1	1						1					0	1	1	2					1
Case 168	1	0	4c	0	0	1	1	1	1						1						1	1	2					1
Case 169	0	0		0	0	1	1	1	1											1	1	1	2										1
Case 170	0	0		0	0	1	1	1	1											1	1	1	2										1
Case 171	1	0		1	0	1	1	1	1						0					1	1	1	2										1
Case 172	0	0	5	0	1	0	1	1	2	1		1	0		1						1	2	3			1
Case 173	1	0	5	0	1	0	1	1	2	1					0	0	1	0		1	1	2	3								1
Case 174	0	0	5	0	1	0	1	1	2	1	0	1	1		1					0	1	2	3			1
Case 175	1	0		1	1	0	1	1	2	1		1			1	0	0	0		0	1	2	3			1
Case 176	0	0		1	1	0	1	1	2	1	0	1	1		1						1	2	3			1
Case 177	0	0		0	1	0	1	1	2	1	1	1	1	0	1						1	2	3		1
Case 178	0	0		0	1	0	1	1	2	1	0	1	0		1						1	2	3			1
Case 179	0	0	5	0	0	0	1	1	2	1					1	1	1	1		1	1	2	3								1
Case 180	0	1	5	0	0	0	1	1	2	1		0	0		1		0	1		1	1	2	3								1
Case 181	0	0	4a	0	0	0	1	1	2	1					0	0	1	1		1	1	2	3								1
Case 182	0	1	4a	0	0	0	1	1	2	1		1	0		1						1	2	3							1
Case 183	0	0	4b	0	0	0	1	1	2	1	1	1	1		1					0	1	2	3			1
Case 184	0	0	4b	0	0	0	1	1	2	1	1	1	1		1					0	1	2	3			1
Case 185	0	0	4c	1	0	0	1	1	2	1	0	1	0		1						1	2	3		1
Case 186	0	0	4c	0	0	0	1	1	2	1	1	1	1		1						1	2	3		1
Case 187	0	0	4c	1	0	0	1	1	2	1							0	1		1	1	2	3								1
Case 188	0	0		1	0	0	1	1	2	1	0	1	1		1		1	1		1	1	2	3		1
Case 189	0	0		1	0	0	1	1	2	1	0	1	1		1					0	1	2	3			1
Case 190	1	0	5	0	1	0	1	1	2	2							0	0		1	1	2	3							1
Case 191	1	0		0	1	0	1	1	2	2						0	0	0		1	1	2	3			1
Case 192	0	0		1	1	0	1	1	2	2		0	0		1					0	1	2	3			1
Case 193	0	0		0	0	0	1	1	2	2					1	0	0	0		1	1	2	3								1
Case 194	0	1		0	0	0	1	1	2	2	0	0	0		1						1	2	3	1
Case 195	0	0	4c	0	1	0	1	1	1											1	1	2	3							1
Case 196	0	0	5	1	1	0	1	1	2	1	1	1	1		1	0	1	1		1	1	1	3					1
Case 197	1	1	4b	0	1	0	1	1	2	1		1	1		1						1	1	3					1
Case 198	1	0	4b	0	1	0	1	1	2	1		1	0		1					0	1	1	3					1
Case 199	1	0	5	1	0	0	1	1	2	1	1	1	1		1					1	1	1	3					1
Case 200	0	0	5	0	0	0	1	1	2	1		0	0		0	0	1	0		1	1	1	3										1
Case 201	1	0	5	1	0	0	1	1	2	1	1	1	0		1	1	1	1		1	1	1	3					1
Case 202	1	0	4b	0	0	0	1	1	2	1	1	0	0		1						1	1	3					1
Case 203	0	0	4b	1	0	0	1	1	2	1					1		1	1		1	1	1	3					1
Case 204	1	0	4b	0	0	0	1	1	2	1	0	1	1		1						1	1	3					1
Case 205	0	0		1	0	0	1	1	2	1						1	1	1		1	1	1	3					1
Case 206	1	0	4b	0	1	0	1	1	2	2	0	0	0		1					0	1	1	3					1
Case 207	0	0	4c	1	1	0	1	1	2	2					1		0	0		1	1	1	3					1
Case 208	0	0	5	1	0	0	1	1	2	2	0	0	0		0	0	0	0		1	1	1	3										1
Case 209	0	0	4c	0	1	0	1	1	1						1						1	1	3					1
Case 210	0	0		0	1	0	1	1	1						1						1	1	3					1
Case 211	1	0		0	0	0	1	1	1											1	1	1	3
Case 212	0	1		0	0	0	1	1	1						0					1	1	1	3
Case 213	0	0	4b	1	1	1	1	1	2	1	0	1	1		1	1	1	0		1	1	2	3			1
Case 214	0	0		0	1	1	1	1	2	1	1	0	0		1						1	2	3		1
Case 215	1	0	5	0	0	1	1	1	2	1							1	1		1	1	2	3								1
Case 216	0	0	5	0	0	1	1	1	2	1						1	1	1		1	1	2	3								1
Case 217	0	0	5	0	0	1	1	1	2	1					0	1	1	1		1	1	2	3								1
Case 218	0	0	5	1	0	1	1	1	2	1					0	0	1	1		1	1	2	3							1
Case 219	1	1	5	0	0	1	1	1	2	1	0	1	1		1						1	2	3							1
Case 220	0	0	4b	0	0	1	1	1	2	1					1	0	0	1		1	1	2	3
Case 221	0	0	4c	0	0	1	1	1	2	1		1	1		1		1	1		1	1	2	3								1
Case 222	1	0		0	0	1	1	1	2	1	0	1	0		1					0	1	2	3		1
Case 223	1	1	5	0	1	1	1	1	1											1	1	2	3							1
Case 224	0	0	5	1	1	1	1	1	2	1	1	1	1		1					0	1	1	3					1
Case 225	0	0	5	0	1	1	1	1	2	1						0	1	0		1	1	1	3										1
Case 226	0	0	4b	1	0	1	1	1	2	1	1	1	0		1					0	1	1	3					1
Case 227	0	0		0	1	1	1	1	2	2	0	0	0		1						1	1	3					1
Case 228	1	0	5	0	1	1	1	1	1											1	1	1	3										1
Case 229	0	0	4b	0	1	1	1	1	1											1	1	1	3										1
Case 230	0	0	5	0	1	0	1	1	2	1						0	1	1		1	1	2	4								1
Case 231	0	0	5	0	1	0	1	1	2	1	0	0	1		1						1	2	4			1
Case 232	0	1	5	0	1	0	1	1	2	1	1	1	1		1					1	1	2	4		1
Case 233	0	0	5	0	1	0	1	1	2	1	1	1	1		1						1	2	4		1
Case 234	0	0	4b	1	1	0	1	1	2	1		1	1		1					0	1	2	4			1
Case 235	1	0		1	1	0	1	1	2	1	1	1			1			0	0	1	1	2	4		1
Case 236	0	0		0	1	0	1	1	2	1	1	1	1		1						1	2	4			1
Case 237	1	0	5	0	0	0	1	1	2	1						1	1	1		1	1	2	4							1
Case 238	1	0	5	0	0	0	1	1	2	1	1	1	1		1	1	1	1		1	1	2	4		1
Case 239	0	0	5	0	0	0	1	1	2	1					1	1	1	0		1	1	2	4								1
Case 240	0	0	5	0	0	0	1	1	2	1							1	1		1	1	2	4							1
Case 241	0	1	5	0	0	0	1	1	2	1	1	0	1		1						1	2	4	1
Case 242	1	1	5	0	0	0	1	1	2	1						1	0	1		1	1	2	4								1
Case 243	1	0	4a	1	0	0	1	1	2	1	1	0	0		1						1	2	4		1
Case 244	0	0	4b	0	0	0	1	1	2	1								1		1	1	2	4								1
Case 245	0	0	4b	1	0	0	1	1	2	1					1	1	1	0		1	1	2	4								1
Case 246	0	0	4c	0	0	0	1	1	2	1	0	1	1		1					0	1	2	4			1
Case 247	0	0		1	0	0	1	1	2	1	1	1	1	1	1					0	1	2	4	1
Case 248	0	0		1	0	0	1	1	2	1	0	1	1		1					1	1	2	4			1
Case 249	0	0		1	0	0	1	1	1						1					1	1	2	4								1
Case 250	0	0	4b	0	1	0	1	1	2	1					0	0	1	0		1	1	1	4										1
Case 251	0	0	5	0	0	0	1	1	2	1						1	1	1		1	1	1	4										1
Case 252	0	0	4c	0	0	0	1	1	2	1					1	1	1	1		1	1	1	4					1
Case 253	0	0	4c	0	0	0	1	1	2	2	0	0	0		1						1	1	4					1
Case 254	0	0		0	0	0	1	1	2	2					0			0		1	1	1	4										1
Case 255	1	0	4b	0	1	1	1	1	2	1					0	1	1	1		1	1	2	4								1
Case 256	0	0	4c	0	1	1	1	1	2	1	0	1	1		1						1	2	4			1
Case 257	0	0	5	0	0	1	1	1	2	1	1	1	1		1					0	1	2	4			1
Case 258	0	0	5	0	0	1	1	1	2	1					1	1	1	0		1	1	2	4							1
Case 259	0	0	5	0	0	1	1	1	1						1					1	1	2	4		1
Case 260	0	0		0	0	1	1	1	2	1					1	1	1	0		1	1	1	4										1
Case 261	0	0	5	0	1	0	1	1	2	1	1	1	1	0	1						1	2	5		1
Case 262	0	0	4b	0	1	0	1	1	2	1							1	1		1	1	2	5								1
Case 263	1	0		0	1	0	1	1	2	1						1	1	1		1	1	2	5							1
Case 264	0	0		0	1	0	1	1	2	1							1	1		1	1	2	5								1
Case 265	0	0	5	0	0	0	1	1	2	1					1	1	1	1		1	1	2	5							1
Case 266	0	0	5	1	0	0	1	1	2	1	1	1	1		1	0	1	0		1	1	2	5			1
Case 267	1	0	5	0	0	0	1	1	2	1	1	1	1		1						1	2	5		1
Case 268	1	0	5	1	0	0	1	1	2	1	0	1	1		1	1	1	1	1	1	1	2	5								1
Case 269	1	0	4b	0	0	0	1	1	2	1	1	1	1		1	0	1	0		1	1	2	5			1
Case 270	1	0	4c	1	0	0	1	1	2	1	1	1	1		1	1	1	1		1	1	2	5			1
Case 271	0	0	4c	1	0	0	1	1	2	1	1	1			1					1	1	2	5		1
Case 272	0	0	4c	1	0	0	1	1	2	1					0	1	1	1		1	1	2	5							1
Case 273	1	1	4c	1	0	0	1	1	2	1	0	0	1			1	1	1	0	1	1	2	5								1
Case 274	0	0		0	0	0	1	1	2	1	1	1	1	0	1						1	2	5			1
Case 275	0	0		0	0	0	1	1	2	1					0	1	1	1	0	1	1	2	5							1
Case 276	0	0		0	0	0	1	1	2	1	1	1	1	1	1					1	1	2	5		1
Case 277	1	0		1	0	0	1	1	2	1	1	1	1		1	1	1	1		1	1	2	5			1
Case 278	0	0		1	0	0	1	1	2	1		1	1		1	1	1	1		1	1	2	5			1
Case 279	1	0	4c	1	0	0	1	1	2	2	0	1	0		1					0	1	2	5			1
Case 280	0	0	4b	0	1	0	1	1	1											1	1	2	5						1
Case 281	0	1	5	1	0	0	1	1	2	1	1	1	1		1	1	1	1	1	1	1	1	5										1
Case 282	0	0	4b	0	0	0	1	1	2	1	1	1	1		1						1	1	5					1
Case 283	1	0	4c	1	0	0	1	1	2	1	0	1	0		1	1	1	1		1	1	1	5							1
Case 284	0	0	5	0	1	1	1	1	2	1						1	1	1		1	1	2	5								1
Case 285	0	0	4b	0	1	1	1	1	2	1		1	1		1			0		0	1	2	5	1
Case 286	1	0	3	0	0	1	1	1	2	1						1	1	1	0	1	1	2	5						1
Case 287	0	0	5	0	0	1	1	1	2	1					1	1	1	1	1	1	1	2	5								1
Case 288	0	0	5	1	0	1	1	1	2	1	1	1	1	0	1					0	1	2	5		1
Case 289	1	1	5	0	0	1	1	1	2	1	1	1	1	1	1						1	2	5			1
Case 290	0	0	4b	1	0	1	1	1	2	1	1	0	1		1	1	1	0		1	1	2	5		1
Case 291	1	0		0	0	1	1	1	2	1	1	0	0		1					0	1	2	5		1
Case 292	0	0		0	0	1	1	1	2	1	0	0	1		1					0	1	2	5			1
Case 293	0	0		0	0	1	1	1	2	2							0			1	1	2	5			1
Case 294	0	0	5	0	1	0	1	1	2	1	1	0	0		1					0	0					0
Case 295	1	0	5	0	1	0	1	1	2	1						1	0	0		1	0
Case 296	0	0	4a	0	1	0	1	1	2	1							1	0		1	0								0
Case 297	1	0	4a	0	1	0	1	1	2	1					1	0	1	0		1	0												0
Case 298	0	0	4b	0	1	0	1	1	2	1							0	1		1	0								0
Case 299	0	0	4b	0	1	0	1	1	2	1	0	1	1		1						0				0
Case 300	0	0	4c	0	1	0	1	1	2	1		1			1						0				0
Case 301	1	0	4c	1	1	0	1	1	2	1							0	1		1	0								0
Case 302	1	0	4c	0	1	0	1	1	2	1					0	1	1	0		1	0								0
Case 303	0	0		1	1	0	1	1	2	1		0	1		1						0				0
Case 304	0	0		0	1	0	1	1	2	1							1			1	0										0
Case 305	0	0		0	1	0	1	1	2	1						1	1	0		1	0								0
Case 306	1	0		0	1	0	1	1	2	1	1	1			1						0								0
Case 307	0	0		0	1	0	1	1	2	1	1	1	1		1						0									0
Case 308	0	0		1	1	0	1	1	2	1					0		1			1	0								0
Case 309	1	0		1	1	0	1	1	2	1	0	0	1		1						0					0
Case 310	0	0		0	1	0	1	1	2	1		1			1						0				0
Case 311	0	1		0	1	0	1	1	2	1						1				1	0									0
Case 312	0	0	5	1	0	0	1	1	2	1	1	0	0		1					1	0							0
Case 313	0	1	5	0	0	0	1	1	2	1						1	1	1		1	0
Case 314	0	0	4a	1	0	0	1	1	2	1	0	1	0		1						0								0
Case 315	0	0	4a	0	0	0	1	1	2	1	0	1	0		1						0												0
Case 316	0	0	4a	1	0	0	1	1	2	1	1	1			0	0	1			1	0								0
Case 317	0	0	4b	0	0	0	1	1	2	1	1	1	0		1					0	0				0
Case 318	1	0	4b	0	0	0	1	1	2	1							1	1		1	0								0
Case 319	1	0	4b	0	0	0	1	1	2	1							1			1	0								0
Case 320	0	0	4b	0	0	0	1	1	2	1						0	1	1		1	0
Case 321	0	1	4b	0	0	0	1	1	2	1						1	1	1		1	0								0
Case 322	0	0	4b	1	0	0	1	1	2	1						0	1	1		1	0
Case 323	0	0	4c	0	0	0	1	1	2	1					0	0	1	1		1	0								0
Case 324	0	0	4c	1	0	0	1	1	2	1		1			1					0	0				0
Case 325	0	0		0	0	0	1	1	2	1					0	0	0	1		1	0								0
Case 326	0	0		1	0	0	1	1	2	1					1		1	1		1	0									0
Case 327	1	0		1	0	0	1	1	2	1		0	1		1					0	0			0
Case 328	0	1		1	0	0	1	1	2	1					1		1	0		1	0								0
Case 329	0	1		0	0	0	1	1	2	1		0	0		0	1	1	0		1	0								0
Case 330	0	1		1	0	0	1	1	2	1	1	1	1		1					1	0				0
Case 331	0	0	5	1	1	0	1	1	2	2							0	0		1	0												0
Case 332	0	0	4a	0	1	0	1	1	2	2		0	0		1						0			0
Case 333	1	0	4a	0	1	0	1	1	2	2							0	0		1	0										0
Case 334	0	0	4a	0	1	0	1	1	2	2	0	0	0		1						0
Case 335	0	0	4b	1	1	0	1	1	2	2		0			1		0			1	0				0
Case 336	0	0	4b	0	1	0	1	1	2	2							0	0		1	0								0
Case 337	0	0	4b	0	1	0	1	1	2	2						0	0	0		1	0									0
Case 338	0	0	4b	0	1	0	1	1	2	2	0	0			1					0	0							0
Case 339	0	1	4b	0	1	0	1	1	2	2							0			1	0								0
Case 340	0	0	4c	0	1	0	1	1	2	2						0	0	0		1	0
Case 341	0	0	4c	0	1	0	1	1	2	2							0	0		1	0								0
Case 342	0	0		1	1	0	1	1	2	2					0		0			1	0								0
Case 343	0	0		0	1	0	1	1	2	2		0	0		1						0					0
Case 344	1	0		0	1	0	1	1	2	2							0			1	0								0
Case 345	1	0		1	1	0	1	1	2	2					0	0	0	0		1	0									0
Case 346	0	0		0	1	0	1	1	2	2							0	0		1	0								0
Case 347	1	0		0	1	0	1	1	2	2							0			1	0
Case 348	0	0		1	1	0	1	1	2	2					1	0	0	0		0	0									0
Case 349	0	0	3	0	0	0	1	1	2	2							0	0		1	0								0
Case 350	0	1	5	0	0	0	1	1	2	2		0	0		1						0				0
Case 351	0	0	5	1	0	0	1	1	2	2	0	0	0		0	0	0	0		1	0
Case 352	0	0	4a	0	0	0	1	1	2	2							0	0		1	0									0
Case 353	1	0	4b	1	0	0	1	1	2	2					1		0	0		1	0								0
Case 354	0	0	4b	0	0	0	1	1	2	2		0	0		1						0				0
Case 355	0	0	4b	0	0	0	1	1	2	2		0	0		1						0			0
Case 356	1	0	4b	0	0	0	1	1	2	2							0	0		1	0								0
Case 357	0	1	4b	0	0	0	1	1	2	2						0	0	0		1	0							0
Case 358	1	0		0	0	0	1	1	2	2							0	0		1	0									0
Case 359	0	0		0	0	0	1	1	2	2					0	0	0	0		1	0									0
Case 360	1	1		0	0	0	1	1	2	2		0	0		1						0					0
Case 361	0	0	3	0	1	0	1	1	1											1	0									0
Case 362	1	0	5	0	1	0	1	1	1						1						0							0
Case 363	0	0	5	0	1	0	1	1	1											1	0									0
Case 364	0	0	5	0	1	0	1	1	1											1	0							0
Case 365	0	0	5	0	1	0	1	1	1											1	0								0
Case 366	0	0	5	0	1	0	1	1	1											1	0										0
Case 367	0	0	5	0	1	0	1	1	1						1						0				0
Case 368	0	0	5	0	1	0	1	1	1											1	0										0
Case 369	0	0	5	0	1	0	1	1	1						1						0					0
Case 370	0	0	5	0	1	0	1	1	1						1						0			0
Case 371	0	0	4a	0	1	0	1	1	1											1	0								0
Case 372	1	0	4a	0	1	0	1	1	1						1						0										0
Case 373	0	0	4a	0	1	0	1	1	1											1	0										0
Case 374	0	0	4a	1	1	0	1	1	1						0					1	0				0
Case 375	0	0	4a	0	1	0	1	1	1											1	0										0
Case 376	0	0	4a	0	1	0	1	1	1						1						0				0
Case 377	0	0	4a	0	1	0	1	1	1											1	0												0
Case 378	0	0	4a	0	1	0	1	1	1											1	0								0
Case 379	0	0	4a	0	1	0	1	1	1						1						0			0
Case 380	0	0	4a	0	1	0	1	1	1						1						0				0
Case 381	0	0	4a	0	1	0	1	1	1											1	0										0
Case 382	0	0	4a	0	1	0	1	1	1						1						0					0
Case 383	0	0	4a	0	1	0	1	1	1						1						0					0
Case 384	0	0	4a	0	1	0	1	1	1						1						0				0
Case 385	0	0	4a	0	1	0	1	1	1						1					0	0								0
Case 386	0	0	4a	1	1	0	1	1	1											1	0				0
Case 387	1	0	4b	0	1	0	1	1	1						1						0					0
Case 388	1	0	4b	0	1	0	1	1	1											1	0									0
Case 389	0	0	4b	0	1	0	1	1	1						1						0							0
Case 390	1	0	4b	0	1	0	1	1	1						1						0				0
Case 391	0	0	4b	0	1	0	1	1	1											1	0								0
Case 392	0	0	4b	0	1	0	1	1	1						1						0				0
Case 393	0	0	4b	1	1	0	1	1	1						1					0	0												0
Case 394	0	0	4b	0	1	0	1	1	1											1	0										0
Case 395	0	0	4b	1	1	0	1	1	1											1	0							0
Case 396	0	0	4b	0	1	0	1	1	1											1	0								0
Case 397	0	0	4b	0	1	0	1	1	1											1	0									0
Case 398	0	0	4b	0	1	0	1	1	1											1	0										0
Case 399	1	0	4b	0	1	0	1	1	1											1	0
Case 400	0	0	4b	1	1	0	1	1	1						1					0	0			0
Case 401	1	0	4b	0	1	0	1	1	1						1						0							0
Case 402	1	0	4b	1	1	0	1	1	1						1					1	0				0
Case 403	0	0	4b	0	1	0	1	1	1											1	0									0
Case 404	1	0	4b	0	1	0	1	1	1						1						0			0
Case 405	1	0	4b	0	1	0	1	1	1											1	0								0
Case 406	0	0	4b	0	1	0	1	1	1											1	0								0
Case 407	1	1	4b	0	1	0	1	1	1						1						0			0
Case 408	0	1	4b	0	1	0	1	1	1											1	0									0
Case 409	0	1	4b	0	1	0	1	1	1											1	0								0
Case 410	0	1	4b	0	1	0	1	1	1						1						0			0
Case 411	0	1	4b	0	1	0	1	1	1						1						0								0
Case 412	0	0	4b	0	1	0	1	1	1											1	0								0
Case 413	0	0	4b	0	1	0	1	1	1											1	0					0
Case 414	1	0	4b	0	1	0	1	1	1											1	0								0
Case 415	1	0	4c	0	1	0	1	1	1											1	0								0
Case 416	0	0	4c	0	1	0	1	1	1											1	0								0
Case 417	1	0	4c	0	1	0	1	1	1						1						0			0
Case 418	0	0	4c	0	1	0	1	1	1						1						0				0
Case 419	0	0	4c	0	1	0	1	1	1						1						0				0
Case 420	0	0		1	1	0	1	1	1						1						0				0
Case 421	0	0		0	1	0	1	1	1						1						0			0
Case 422	1	0		0	1	0	1	1	1											1	0										0
Case 423	0	0		0	1	0	1	1	1						1						0			0
Case 424	0	0		1	1	0	1	1	1						1					1	0				0
Case 425	1	0		0	1	0	1	1	1											1	0			0
Case 426	0	0		0	1	0	1	1	1						1						0			0
Case 427	0	0		0	1	0	1	1	1						1						0			0
Case 428	0	0		0	1	0	1	1	1						1						0					0
Case 429	1	0		0	1	0	1	1	1											1	0									0
Case 430	0	0		0	1	0	1	1	1						1						0				0
Case 431	1	0		0	1	0	1	1	1						1						0				0
Case 432	0	0		0	1	0	1	1	1											1	0									0
Case 433	0	0		0	1	0	1	1	1											1	0								0
Case 434	0	0		0	1	0	1	1	1											1	0									0
Case 435	0	0		0	1	0	1	1	1											1	0										0
Case 436	0	0		0	1	0	1	1	1											1	0								0
Case 437	1	0		0	1	0	1	1	1						1					0	0			0
Case 438	0	0		0	1	0	1	1	1											1	0										0
Case 439	0	0		1	1	0	1	1	1						1						0					0
Case 440	1	0		0	1	0	1	1	1						1						0				0
Case 441	0	1		1	1	0	1	1	1						1					0	0									0
Case 442	0	1		0	1	0	1	1	1						1						0										0
Case 443	0	1		1	1	0	1	1	1						1					1	0					0
Case 444	0	1		0	1	0	1	1	1						1						0							0
Case 445	0	1		0	1	0	1	1	1											1	0								0
Case 446	0	1		1	1	0	1	1	1						1					0	0									0
Case 447	0	1		0	1	0	1	1	1											1	0								0
Case 448	0	1		0	1	0	1	1	1											1	0									0
Case 449	1	0	5	0	0	0	1	1	1						1						0			0
Case 450	0	0	5	0	0	0	1	1	1						1						0				0
Case 451	0	0	5	0	0	0	1	1	1						1						0			0
Case 452	0	0	5	0	0	0	1	1	1											1	0										0
Case 453	0	0	5	0	0	0	1	1	1											1	0									0
Case 454	0	0	4a	0	0	0	1	1	1											1	0								0
Case 455	0	0	4a	0	0	0	1	1	1						1						0				0
Case 456	0	0	4b	0	0	0	1	1	1											1	0								0
Case 457	1	0	4b	0	0	0	1	1	1											1	0									0
Case 458	0	0	4b	0	0	0	1	1	1						1						0							0
Case 459	1	0	4b	0	0	0	1	1	1						1						0					0
Case 460	0	0	4b	0	0	0	1	1	1						1						0				0
Case 461	0	0	4b	0	0	0	1	1	1						1						0					0
Case 462	0	0	4b	0	0	0	1	1	1											1	0										0
Case 463	0	1	4b	0	0	0	1	1	1											1	0							0
Case 464	0	1	4b	0	0	0	1	1	1											1	0							0
Case 465	0	1	4b	0	0	0	1	1	1											1	0				0
Case 466	1	1	4b	0	0	0	1	1	1											1	0								0
Case 467	0	0	4c	0	0	0	1	1	1											1	0				0
Case 468	1	0	4c	0	0	0	1	1	1											1	0								0
Case 469	1	0		0	0	0	1	1	1											1	0									0
Case 470	1	0		0	0	0	1	1	1						0					1	0									0
Case 471	1	0		0	0	0	1	1	1						1						0				0
Case 472	0	0		0	0	0	1	1	1						1						0				0
Case 473	1	0		0	0	0	1	1	1											1	0									0
Case 474	0	0		0	0	0	1	1	1						1						0			0
Case 475	1	0		1	0	0	1	1	1						1					0	0								0
Case 476	1	0		0	0	0	1	1	1						1					0	0							0
Case 477	0	1		0	0	0	1	1	1											1	0									0
Case 478	0	1		0	0	0	1	1	1						1						0				0
Case 479	0	1		0	0	0	1	1	1											1	0									0
Case 480	0	0	5	0	1	1	1	1	2	1							1	0		1	0							0
Case 481	0	0	5	0	1	1	1	1	2	1						1	1	1	1	1	0									0
Case 482	0	0	4b	0	1	1	1	1	2	1	1	0	1		1						0				0
Case 483	0	0	4b	0	1	1	1	1	2	1		1			1						0							0
Case 484	1	0	4c	0	1	1	1	1	2	1	1	0	1		1						0							0
Case 485	0	0		0	1	1	1	1	2	1	0	0	1		1					0	0					0
Case 486	0	0	4b	0	0	1	1	1	2	1						0	1	1		1	0												0
Case 487	0	0		0	0	1	1	1	2	1						0	1	1		1	0							0
Case 488	0	0		0	0	1	1	1	2	1						0	0	1		1	0								0
Case 489	1	0	5	0	1	1	1	1	2	2		0	0		1						0							0
Case 490	1	0		0	1	1	1	1	2	2					0		0	0		1	0								0
Case 491	0	0	3	0	0	1	1	1	2	2		0	0		1					0	0							0
Case 492	0	0	4c	0	0	1	1	1	2	2							0	0		1	0								0
Case 493	0	0		1	0	1	1	1	2	2					0	0	0	0		1	0										0
Case 494	0	0		0	0	1	1	1	2	2	0				1						0									0
Case 495	0	1		0	0	1	1	1	2	2		0	0		1						0					0
Case 496	0	0	3	0	1	1	1	1	1											1	0
Case 497	0	0	5	0	1	1	1	1	1											1	0												0
Case 498	0	0	5	0	1	1	1	1	1											1	0										0
Case 499	1	0	4b	0	1	1	1	1	1											1	0								0
Case 500	0	0	4b	0	1	1	1	1	1						1						0				0
Case 501	0	0	4b	0	1	1	1	1	1						1						0							0
Case 502	0	0	4b	0	1	1	1	1	1											1	0												0
Case 503	1	0	4b	0	1	1	1	1	1						1						0					0
Case 504	0	0	4b	0	1	1	1	1	1						1						0			0
Case 505	0	1	4b	0	1	1	1	1	1						1						0
Case 506	1	1	4b	0	1	1	1	1	1						1						0					0
Case 507	0	0	4c	0	1	1	1	1	1											1	0												0
Case 508	0	0		0	1	1	1	1	1											1	0										0
Case 509	0	0		0	1	1	1	1	1						0					1	0					0
Case 510	0	0		0	1	1	1	1	1						1						0							0
Case 511	0	0		0	1	1	1	1	1						1						0					0
Case 512	0	0		0	1	1	1	1	1						1						0					0
Case 513	0	0		0	1	1	1	1	1						1						0				0
Case 514	1	0		0	1	1	1	1	1											1	0									0
Case 515	0	0	4b	0	0	1	1	1	1											1	0								0
Case 516	0	0	4b	0	0	1	1	1	1						1						0					0
Case 517	1	0	4b	0	0	1	1	1	1						1						0							0
Case 518	0	0		0	1	0	1	2	2	1	1	0	0		0						1	1	1
Case 519	0	0		0	1	0	1	2	2	1		0	1		0						1	2	2			1
Case 520	0	0	5	0	0	0	1	2	2	1						0	1	0		0	1	2	2								1
Case 521	0	0		0	0	0	1	2	2	1						1	1	0		0	1	2	2								1
Case 522	0	0	4b	0	0	0	1	2	1												1	2	2		1
Case 523	0	0	4c	0	1	0	1	2	2	1						1	1	0		0	1	1	2										1
Case 524	1	0		1	0	0	1	2	2	1		0	0		0	0	1	0		0	1	1	2					1
Case 525	0	1		1	1	0	1	2	1						0					0	1	1	2										1
Case 526	0	0	4b	0	1	1	1	2	2	1	1	1			0						1	2	2		1
Case 527	0	0	5	0	1	1	1	2	2	1							1			0	1	1	2										1
Case 528	0	0	5	1	0	1	1	2	1												1	1	2					1
Case 529	0	0	4a	1	0	1	1	2	1												1	1	2										1
Case 530	1	0		0	1	0	1	2	2	1		1			0						1	2	3								1
Case 531	0	0	4c	1	1	0	1	2	1						0					0	1	1	3										1
Case 532	0	1		0	0	1	1	2	2	1						0	1	1		0	1	2	3						1
Case 533	0	0		0	1	1	1	2	2	1								1		0	1	1	3
Case 534	0	0		0	1	0	1	2	2	1	1	1	0		0						1	2	4		1
Case 535	1	0	5	0	1	0	1	2	1												1	2	4								1
Case 536	1	0	4b	0	0	1	1	2	2	1	0	1	1		0					0	1	2	4		1
Case 537	0	0	4b	0	1	1	1	2	2	1						1	1	0		0	1	2	5								1
Case 538	0	0	4b	0	1	0	1	2	2	1		1			0						0			0
Case 539	0	1	4b	0	1	0	1	2	2	1							1			0	0								0
Case 540	0	0	4b	0	0	0	1	2	2	1	0	1	0		0						0							0
Case 541	0	0	4b	0	1	1	1	2	2	1							1			0	0									0
Case 542	0	0	4b	1	1	1	1	2	2	1		1			0	1	0	0		0	0							0
Case 543	0	0	5	1	1	1	1	2	1						0					0	0					0
Case 544	0	0	5	1	0	1	1	2	1												0								0
Case 545	1	0	4b	1	0	1	1	2	1												0							0
Case 546	0	0		1	0	0	0	2	2	2		0	0		0					0	1	2	1			1
Case 547	1	0	5	0	1	0	0	2	2	2							0	0		0	1	1	1										1
Case 548	1	1	4c	0	1	0	0	2	2	2		0	0		0						1	1	1					1
Case 549	0	0	5	0	0	0	0	2	2	2		0			0						1	1	1					1
Case 550	1	0	4a	0	1	0	0	2	1						0						1	1	1					1
Case 551	0	0	4a	0	1	0	0	2	1											0	1	1	1
Case 552	0	0	4a	0	1	0	0	2	1						0					0	1	1	1					1
Case 553	0	0	4a	0	1	0	0	2	1											0	1	1	1					1
Case 554	1	0	4b	0	1	0	0	2	1						0						1	1	1					1
Case 555	0	0	4b	1	1	0	0	2	1						0					0	1	1	1					1
Case 556	0	0	4c	0	1	0	0	2	1											0	1	1	1										1
Case 557	0	1	4c	0	1	0	0	2	1											0	1	1	1										1
Case 558	0	0		1	1	0	0	2	1						0					0	1	1	1										1
Case 559	0	0	4b	0	0	0	0	2	1						0						1	1	1					1
Case 560	0	0	4b	0	0	0	0	2	1						0						1	1	1					1
Case 561	0	1	4b	1	0	0	0	2	1						0					0	1	1	1										1
Case 562	0	1	4c	0	0	0	0	2	1											0	1	1	1					1
Case 563	1	0		0	0	0	0	2	1											0	1	1	1										1
Case 564	0	0		0	1	1	0	2	1											0	1	2	1							1
Case 565	0	0	5	0	1	1	0	2	1											0	1	1	1										1
Case 566	0	0	4b	1	1	1	0	2	1						0						1	1	1					1
Case 567	0	0	4b	0	1	1	0	2	1						0						1	1	1					1
Case 568	1	0	4b	0	0	1	0	2	1											0	1	1	1										1
Case 569	1	1	4c	0	0	0	0	2	2	2			0		0						1	2	2			1
Case 570	0	0	5	0	1	0	0	2	2	2		0	0		0					0	1	2	2			1
Case 571	1	0	4b	0	1	0	0	2	2	2		0			0						1	2	2		1
Case 572	1	0		0	1	0	0	2	2	2						0	0	0		0	1	2	2							1
Case 573	0	0		0	1	0	0	2	2	2			0		0						1	2	2			1
Case 574	1	1		0	1	0	0	2	2	2							0	0		0	1	2	2								1
Case 575	0	0	5	0	0	0	0	2	2	2						0	0	0		0	1	2	2							1
Case 576	0	0	5	1	0	0	0	2	2	2		0			0					0	1	2	2		1
Case 577	0	0		0	0	0	0	2	2	2		0			0						1	2	2		1
Case 578	0	1		0	0	0	0	2	2	2	0	0			0						1	2	2	1
Case 579	0	1		0	0	0	0	2	2	2						0	0	0		0	1	2	2						1
Case 580	1	0	4a	0	1	0	0	2	1											0	1	2	2		1
Case 581	0	1		0	1	0	0	2	1						0						1	2	2			1
Case 582	1	0	5	0	1	0	0	2	2	2							0			0	1	1	2										1
Case 583	0	0	5	0	0	0	0	2	2	2						0	0			0	1	1	2										1
Case 584	0	1	5	0	0	0	0	2	2	2					0		0	0		0	1	1	2										1
Case 585	0	0	4b	0	0	0	0	2	2	2							0			0	1	1	2
Case 586	1	1	4b	0	0	0	0	2	2	2							0			0	1	1	2										1
Case 587	1	0	4c	0	0	0	0	2	2	2		0			0						1	1	2										1
Case 588	0	0		0	0	0	0	2	2	2							0			0	1	1	2										0
Case 589	0	1	5	1	1	0	0	2	1						0					0	1	1	2					1
Case 590	1	0	4a	0	1	0	0	2	1						0						1	1	2					1
Case 591	1	0	4b	0	1	0	0	2	1						0						1	1	2										1
Case 592	0	0	4b	0	1	0	0	2	1											0	1	1	2										1
Case 593	0	0	4b	1	1	0	0	2	1						0					0	1	1	2										1
Case 594	0	0	4b	0	1	0	0	2	1											0	1	1	2										1
Case 595	1	1	4b	0	1	0	0	2	1											0	1	1	2										1
Case 596	0	1	4b	0	1	0	0	2	1						0						1	1	2					1
Case 597	0	1	4b	0	1	0	0	2	1						0						1	1	2					1
Case 598	0	0	4c	0	1	0	0	2	1											0	1	1	2										1
Case 599	1	0		0	1	0	0	2	1											0	1	1	2										1
Case 600	1	0		0	1	0	0	2	1											0	1	1	2										1
Case 601	0	0		0	1	0	0	2	1						0					0	1	1	2
Case 602	1	0	5	0	0	0	0	2	1						0						1	1	2					1
Case 603	0	0	5	0	0	0	0	2	1											0	1	1	2										1
Case 604	0	0	4b	1	0	0	0	2	1						0					0	1	1	2					1
Case 605	0	0	4b	0	0	0	0	2	1											0	1	1	2										1
Case 606	0	0		0	0	0	0	2	1											0	1	1	2										1
Case 607	0	0		0	0	0	0	2	1						0						1	1	2					1
Case 608	0	0		0	0	0	0	2	1											0	1	1	2										1
Case 609	0	0		1	0	0	0	2	1						0						1	1	2					1
Case 610	1	0	4b	1	1	1	0	2	2	2					0					0	1	2	2			1
Case 611	1	0		0	1	1	0	2	2	2							0	0		0	1	2	2			1
Case 612	1	0		1	1	1	0	2	2	2		0	0		0						1	2	2			1
Case 613	0	0	4c	0	1	1	0	2	1											0	1	2	2								1
Case 614	0	0	4b	0	1	1	0	2	2	2		0			0	0	0	0		0	1	1	2										1
Case 615	0	0	4b	1	1	1	0	2	2	2		0	0		0		0	0		0	1	1	2					1
Case 616	1	0	4c	0	1	1	0	2	2	2		0	0		0						1	1	2					1
Case 617	0	0		0	1	1	0	2	2	2					0						1	1	2										1
Case 618	0	0		0	1	1	0	2	2	2	0	0	0		0						1	1	2					1
Case 619	0	0	5	1	0	1	0	2	2	2					0	0	0	0		0	1	1	2										1
Case 620	1	0	4c	0	0	1	0	2	2	2	0	0	0		0						1	1	2					1
Case 621	0	0	4a	0	1	1	0	2	1						0						1	1	2					1
Case 622	0	0	4b	0	1	1	0	2	1						0					0	1	1	2					1
Case 623	0	0	4b	0	1	1	0	2	1						0						1	1	2					1
Case 624	0	0	4b	0	1	1	0	2	1											0	1	1	2										1
Case 625	0	0	4b	0	1	1	0	2	1											0	1	1	2										1
Case 626	0	0	4b	0	1	1	0	2	1											0	1	1	2										1
Case 627	0	0	4b	0	1	1	0	2	1						0						1	1	2					1
Case 628	0	1	4b	0	1	1	0	2	1						0					0	1	1	2					1
Case 629	1	0	4b	0	1	1	0	2	1											0	1	1	2										1
Case 630	0	0	4c	0	1	1	0	2	1						0						1	1	2					1
Case 631	0	0	4c	0	1	1	0	2	1											0	1	1	2										1
Case 632	0	0		0	1	1	0	2	1						0						1	1	2					1
Case 633	0	0		1	1	1	0	2	1						0						1	1	2					1
Case 634	0	0		0	1	1	0	2	1						0						1	1	2					1
Case 635	0	0		0	1	1	0	2	1											0	1	1	2					1
Case 636	0	0		0	1	1	0	2	1											0	1	1	2										1
Case 637	1	0	5	1	0	1	0	2	1						0					0	1	1	2										1
Case 638	0	0	4b	0	0	1	0	2	1											0	1	1	2					1
Case 639	0	0	4b	0	0	1	0	2	1						0						1	1	2					1
Case 640	1	0	4c	0	0	1	0	2	1						0						1	1	2					1
Case 641	0	0		1	0	1	0	2	1						0					0	1	1	2										1
Case 642	0	0		0	0	1	0	2	1											0	1	1	2										1
Case 643	0	0	5	0	1	0	0	2	2	2						0	0	0		0	1	2	3							1
Case 644	0	0	4a	0	1	0	0	2	2	2		0			0						1	2	3				1
Case 645	0	0	4b	0	1	0	0	2	2	2			0		0						1	2	3			1
Case 646	1	0	4c	0	1	0	0	2	2	2		0			0						1	2	3			1
Case 647	0	0		0	1	0	0	2	2	2	0	0	0		0						1	2	3			1
Case 648	1	0		0	1	0	0	2	2	2						0	0	0		0	1	2	3								1
Case 649	0	0		0	1	0	0	2	2	2	0	0	0		0						1	2	3			1
Case 650	0	1	4c	0	0	0	0	2	2	2							0			0	1	2	3	1
Case 651	0	0	5	0	1	0	0	2	1											0	1	1	3										1
Case 652	0	0	5	0	1	0	0	2	1						0						1	1	3					1
Case 653	0	0	5	0	1	0	0	2	1						0						1	1	3					1
Case 654	0	0	4b	1	1	0	0	2	1											0	1	1	3										1
Case 655	0	0		0	1	0	0	2	1						0						1	1	3					1
Case 656	0	1		0	1	0	0	2	1											0	0		3							0
Case 657	0	0	5	0	1	1	0	2	2	2					0						1	2	3			1
Case 658	1	0		1	1	1	0	2	2	2						0	0	0		0	1	2	3							1
Case 659	0	0		0	1	1	0	2	2	2	0	0	0		0						1	2	3		1
Case 660	0	0	4b	0	0	1	0	2	1						0					0	1	2	3								1
Case 661	0	0	4a	0	1	1	0	2	1						0						1	1	3					1
Case 662	0	1	4a	0	1	1	0	2	1						0						1	1	3					1
Case 663	0	0	4b	0	1	1	0	2	1											0	1	1	3										1
Case 664	0	0	4b	0	1	1	0	2	1											0	1	1	3
Case 665	0	0	4b	1	1	1	0	2	1						0					0	1	1	3					1
Case 666	1	0		1	1	1	0	2	1						0					0	1	1	3										1
Case 667	0	0		0	1	1	0	2	1											0	1	1	3										1
Case 668	0	1		1	1	1	0	2	1						0					0	1	1	3										1
Case 669	0	0	4c	0	0	1	0	2	1											0	1	1	3										1
Case 670	0	1	4c	0	0	0	0	2	1											0	1	1	4										1
Case 671	1	0		1	1	1	0	2	2	2		0			0					0	1	2	4		1
Case 672	0	1		0	1	0	0	2	1											0	1	1	5					1
Case 673	0	1	4b	0	0	1	0	2	1											0	1	1	5										1
Case 674	0	0	4a	0	1	0	0	2	2	2							0			0	0								0
Case 675	1	0	4a	1	1	0	0	2	2	2							0			0	0									0
Case 676	0	0	4a	0	1	0	0	2	2	2			0		0						0				0
Case 677	0	0	4b	0	1	0	0	2	2	2		0			0						0			0
Case 678	0	1	4b	0	1	0	0	2	2	2	0				0						0								0
Case 679	0	1	4c	0	1	0	0	2	2	2		0	0		0						0					0
Case 680	0	0		0	1	0	0	2	2	2							0			0	0												0
Case 681	1	0		0	1	0	0	2	2	2	0	0	0		0						0			0
Case 682	1	0		0	1	0	0	2	2	2							0			0	0									0
Case 683	1	0		0	1	0	0	2	2	2							0			0	0										0
Case 684	0	0		1	1	0	0	2	2	2		0			0						0				0
Case 685	1	0		0	1	0	0	2	2	2							0			0	0									0
Case 686	1	0	5	0	0	0	0	2	2	2							0			0	0									0
Case 687	1	0	4a	1	0	0	0	2	2	2	0	0	0		0					0	0				0
Case 688	0	0	4b	0	0	0	0	2	2	2							0			0	0								0
Case 689	0	0		0	0	0	0	2	2	2							0			0	0									0
Case 690	0	0		1	0	0	0	2	2	2	0	0	0		0					0	0					0
Case 691	0	0		0	0	0	0	2	2	2					0		0	0		0	0								0
Case 692	0	0	3	0	1	0	0	2	1											0	0								0
Case 693	1	0	5	0	1	0	0	2	1											0	0									0
Case 694	0	0	5	0	1	0	0	2	1						0						0				0
Case 695	0	0	5	0	1	0	0	2	1						0						0					0
Case 696	0	0	5	0	1	0	0	2	1						0						0			0
Case 697	0	0	5	0	1	0	0	2	1											0	0												0
Case 698	1	0	5	0	1	0	0	2	1						0						0							0
Case 699	0	0	5	1	1	0	0	2	1						0						0
Case 700	0	0	5	0	1	0	0	2	1						0						0					0
Case 701	1	0	5	0	1	0	0	2	1											0	0								0
Case 702	0	0	5	0	1	0	0	2	1											0	0												0
Case 703	1	0	5	0	1	0	0	2	1						0						0				0
Case 704	0	0	5	0	1	0	0	2	1						0						0					0
Case 705	0	0	5	0	1	0	0	2	1											0	0			0
Case 706	0	0	5	0	1	0	0	2	1						0						0			0
Case 707	0	0	5	0	1	0	0	2	1											0	0									0
Case 708	0	0	5	0	1	0	0	2	1											0	0								0
Case 709	0	0	5	0	1	0	0	2	1						0						0					0
Case 710	0	0	5	0	1	0	0	2	1						0						0				0
Case 711	0	0	5	0	1	0	0	2	1						0						0				0
Case 712	0	0	5	0	1	0	0	2	1											0	0									0
Case 713	0	0	5	0	1	0	0	2	1						0						0			0
Case 714	0	0	5	1	1	0	0	2	1						0					0	0								0
Case 715	1	0	5	0	1	0	0	2	1						0					0	0								0
Case 716	0	0	5	0	1	0	0	2	1						0						0				0
Case 717	0	0	5	0	1	0	0	2	1												0				0
Case 718	0	1	5	0	1	0	0	2	1											0	0								0
Case 719	1	1	5	0	1	0	0	2	1						0						0			0
Case 720	1	1	5	0	1	0	0	2	1											0	0
Case 721	0	1	5	0	1	0	0	2	1						0						0					0
Case 722	0	0	5	1	1	0	0	2	1						0					0	0								0
Case 723	0	0	5	1	1	0	0	2	1						0					0	0					0
Case 724	1	0	5	0	1	0	0	2	1											0	0									0
Case 725	1	1	5	0	1	0	0	2	1						0						0			0
Case 726	1	0	4a	0	1	0	0	2	1						0						0			0
Case 727	0	0	4a	0	1	0	0	2	1											0	0									0
Case 728	0	0	4a	0	1	0	0	2	1						0					0	0			0
Case 729	0	0	4a	0	1	0	0	2	1											0	0												0
Case 730	0	0	4a	0	1	0	0	2	1											0	0									0
Case 731	0	0	4a	0	1	0	0	2	1											0	0
Case 732	0	0	4a	0	1	0	0	2	1						0						0			0
Case 733	0	0	4a	0	1	0	0	2	1											0	0			0
Case 734	0	0	4a	1	1	0	0	2	1						0						0				0
Case 735	0	0	4a	0	1	0	0	2	1						0						0					0
Case 736	0	0	4a	0	1	0	0	2	1											0	0								0
Case 737	1	0	4a	0	1	0	0	2	1											0	0			0
Case 738	1	0	4a	0	1	0	0	2	1											0	0			0
Case 739	0	0	4a	0	1	0	0	2	1											0	0									0
Case 740	0	1	4a	0	1	0	0	2	1											0	0								0
Case 741	0	1	4a	0	1	0	0	2	1											0	0
Case 742	1	1	4a	0	1	0	0	2	1						0						0				0
Case 743	0	1	4a	0	1	0	0	2	1						0						0				0
Case 744	0	0	4a	0	1	0	0	2	1											0	0												1
Case 745	1	1	4a	0	1	0	0	2	1						0						0				0
Case 746	0	0	4b	0	1	0	0	2	1						0						0					0
Case 747	0	0	4b	0	1	0	0	2	1											0	0								0
Case 748	1	0	4b	1	1	0	0	2	1						0						0								0
Case 749	1	0	4b	1	1	0	0	2	1											0	0								0
Case 750	1	0	4b	0	1	0	0	2	1						0						0							0
Case 751	1	0	4b	0	1	0	0	2	1						0						0							0
Case 752	0	0	4b	0	1	0	0	2	1						0						0					0
Case 753	1	0	4b	0	1	0	0	2	1											0	0			0
Case 754	0	0	4b	0	1	0	0	2	1											0	0										0
Case 755	0	0	4b	0	1	0	0	2	1						0						0			0
Case 756	0	0	4b	0	1	0	0	2	1											0	0			0
Case 757	0	0	4b	0	1	0	0	2	1											0	0										0
Case 758	0	0	4b	0	1	0	0	2	1											0	0											0
Case 759	0	0	4b	0	1	0	0	2	1						0						0							0
Case 760	1	0	4b	0	1	0	0	2	1						0						0				0
Case 761	0	0	4b	0	1	0	0	2	1						0						0			0
Case 762	0	0	4b	0	1	0	0	2	1						0						0					0
Case 763	0	0	4b	0	1	0	0	2	1						0						0				0
Case 764	0	0	4b	0	1	0	0	2	1						0						0					0
Case 765	0	0	4b	0	1	0	0	2	1						0						0				0
Case 766	0	0	4b	0	1	0	0	2	1											0	0								0
Case 767	1	0	4b	0	1	0	0	2	1											0	0									0
Case 768	0	0	4b	0	1	0	0	2	1						0						0				0
Case 769	0	0	4b	0	1	0	0	2	1						0						0			0
Case 770	0	0	4b	0	1	0	0	2	1											0	0								0
Case 771	0	0	4b	0	1	0	0	2	1											0	0								0
Case 772	0	0	4b	0	1	0	0	2	1											0	0								0
Case 773	0	0	4b	0	1	0	0	2	1											0	0
Case 774	1	0	4b	0	1	0	0	2	1											0	0									0
Case 775	0	0	4b	0	1	0	0	2	1						0						0					0
Case 776	1	0	4b	0	1	0	0	2	1											0	0								0
Case 777	1	0	4b	0	1	0	0	2	1											0	0								0
Case 778	0	0	4b	0	1	0	0	2	1						0						0			0
Case 779	0	0	4b	0	1	0	0	2	1						0						0												0
Case 780	0	0	4b	0	1	0	0	2	1											0	0										0
Case 781	0	0	4b	0	1	0	0	2	1						0						0				0
Case 782	0	0	4b	0	1	0	0	2	1											0	0									0
Case 783	0	0	4b	0	1	0	0	2	1						0						0					0
Case 784	0	0	4b	0	1	0	0	2	1						0						0					0
Case 785	0	0	4b	0	1	0	0	2	1											0	0							0
Case 786	0	0	4b	0	1	0	0	2	1											0	0												0
Case 787	0	0	4b	0	1	0	0	2	1											0	0								0
Case 788	0	0	4b	0	1	0	0	2	1						0						0							0
Case 789	0	0	4b	0	1	0	0	2	1											0	0								0
Case 790	0	0	4b	0	1	0	0	2	1						0						0							0
Case 791	0	0	4b	0	1	0	0	2	1						0						0					0
Case 792	0	0	4b	0	1	0	0	2	1											0	0								0
Case 793	0	0	4b	1	1	0	0	2	1						0						0					0
Case 794	1	0	4b	0	1	0	0	2	1						0					0	0							0
Case 795	0	0	4b	0	1	0	0	2	1											0	0			0
Case 796	0	0	4b	0	1	0	0	2	1											0	0									0
Case 797	0	0	4b	0	1	0	0	2	1						0						0				0
Case 798	1	0	4b	0	1	0	0	2	1						0						0			0
Case 799	1	0	4b	0	1	0	0	2	1											0	0								0
Case 800	0	0	4b	1	1	0	0	2	1											0	0								0
Case 801	0	0	4b	0	1	0	0	2	1											0	0							0
Case 802	1	0	4b	0	1	0	0	2	1											0	0									0
Case 803	0	0	4b	0	1	0	0	2	1						0						0					0
Case 804	0	0	4b	0	1	0	0	2	1											0	0								0
Case 805	0	0	4b	0	1	0	0	2	1											0	0								0
Case 806	1	1	4b	0	1	0	0	2	1											0	0								0
Case 807	1	1	4b	0	1	0	0	2	1											0	0								0
Case 808	1	1	4b	0	1	0	0	2	1						0						0				0
Case 809	0	1	4b	0	1	0	0	2	1						0						0			0
Case 810	0	1	4b	0	1	0	0	2	1						0						0			0
Case 811	0	1	4b	0	1	0	0	2	1						0						0			0
Case 812	0	1	4b	0	1	0	0	2	1						0						0					0
Case 813	0	1	4b	0	1	0	0	2	1						0						0			0
Case 814	0	1	4b	0	1	0	0	2	1						0						0				0
Case 815	0	1	4b	0	1	0	0	2	1						0						0				0
Case 816	0	1	4b	0	1	0	0	2	1						0						0				0
Case 817	1	1	4b	1	1	0	0	2	1						0						0					0
Case 818	0	1	4b	0	1	0	0	2	1						0						0							0
Case 819	1	1	4b	1	1	0	0	2	1											0	0								0
Case 820	0	0	4b	0	1	0	0	2	1						0						0				0
Case 821	1	0	4b	0	1	0	0	2	1											0	0												1
Case 822	0	1	4b		1	0	0	2	1											0	0										0
Case 823	1	0	4c	0	1	0	0	2	1						0						0				0
Case 824	1	0	4c	0	1	0	0	2	1											0	0								0
Case 825	0	0	4c	0	1	0	0	2	1											0	0									0
Case 826	0	0	4c	0	1	0	0	2	1						0						0									0
Case 827	1	0	4c	0	1	0	0	2	1						0						0					0
Case 828	0	0	4c	0	1	0	0	2	1											0	0								0
Case 829	0	0	4c	0	1	0	0	2	1						0						0			0
Case 830	1	0	4c	0	1	0	0	2	1											0	0
Case 831	0	0	4c	0	1	0	0	2	1						0						0			0
Case 832	1	0	4c	0	1	0	0	2	1											0	0
Case 833	0	1	4c	0	1	0	0	2	1						0						0				0
Case 834	1	1	4c	0	1	0	0	2	1											0	0								0
Case 835	0	0	4c	1	1	0	0	2	1											0	0									0
Case 836	0	1	4c	0	1	0	0	2	1						0						0				0
Case 837	1	0		0	1	0	0	2	1											0	0								0
Case 838	0	0		1	1	0	0	2	1						0					0	0												0
Case 839	0	0		0	1	0	0	2	1											0	0												0
Case 840	1	0		0	1	0	0	2	1						0						0											0
Case 841	0	0		0	1	0	0	2	1											0	0									0
Case 842	0	0		0	1	0	0	2	1											0	0										0
Case 843	1	0		0	1	0	0	2	1						0						0				0
Case 844	0	0		0	1	0	0	2	1						0						0			0
Case 845	0	0		0	1	0	0	2	1											0	0												0
Case 846	0	0		0	1	0	0	2	1						0						0				0
Case 847	0	0		0	1	0	0	2	1											0	0									0
Case 848	0	0		0	1	0	0	2	1											0	0								0
Case 849	0	0		0	1	0	0	2	1						0						0							0
Case 850	0	0		0	1	0	0	2	1											0	0									0
Case 851	0	0		0	1	0	0	2	1						0						0			0
Case 852	1	0		0	1	0	0	2	1						0						0					0
Case 853	0	0		0	1	0	0	2	1						0						0				0
Case 854	0	0		0	1	0	0	2	1						0						0				0
Case 855	1	0		0	1	0	0	2	1											0	0									0
Case 856	0	0		0	1	0	0	2	1											0	0									0
Case 857	1	0		0	1	0	0	2	1						0						0				0
Case 858	0	0		0	1	0	0	2	1											0	0										0
Case 859	1	0		0	1	0	0	2	1											0	0									0
Case 860	1	0		0	1	0	0	2	1						0						0				0
Case 861	0	0		0	1	0	0	2	1						0						0				0
Case 862	1	0		0	1	0	0	2	1											0	0								0
Case 863	0	0		0	1	0	0	2	1						0						0				0
Case 864	0	0		1	1	0	0	2	1											0	0								0
Case 865	0	0		0	1	0	0	2	1											0	0									0
Case 866	0	0		0	1	0	0	2	1											0	0								0
Case 867	1	0		0	1	0	0	2	1											0	0								0
Case 868	1	0		1	1	0	0	2	1						0					0	0				0
Case 869	0	0		0	1	0	0	2	1											0	0									0
Case 870	1	0		0	1	0	0	2	1											0	0									0
Case 871	1	0		0	1	0	0	2	1											0	0									0
Case 872	1	0		0	1	0	0	2	1						0						0			0
Case 873	0	0		0	1	0	0	2	1											0	0								0
Case 874	1	0		0	1	0	0	2	1						0						0			0
Case 875	0	0		0	1	0	0	2	1						0						0									0
Case 876	1	0		0	1	0	0	2	1											0	0								0
Case 877	1	0		0	1	0	0	2	1											0	0									0
Case 878	0	0		0	1	0	0	2	1						0						0								0
Case 879	1	0		0	1	0	0	2	1											0	0										0
Case 880	1	0		0	1	0	0	2	1						0						0				0
Case 881	0	0		0	1	0	0	2	1						0						0					0
Case 882	1	0		0	1	0	0	2	1											0	0									0
Case 883	1	1		0	1	0	0	2	1											0	0									0
Case 884	0	1		0	1	0	0	2	1						0						0								0
Case 885	1	1		0	1	0	0	2	1											0	0										0
Case 886	0	1		0	1	0	0	2	1						0					0	0										0
Case 887	0	1		0	1	0	0	2	1						0					0	0								0
Case 888	0	1		0	1	0	0	2	1											0	0									0
Case 889	0	1		0	1	0	0	2	1						0						0				0
Case 890	0	0	5	1	0	0	0	2	1						0					0	0								0
Case 891	0	0	5	0	0	0	0	2	1											0	0								0
Case 892	0	0	5	0	0	0	0	2	1						0						0										0
Case 893	0	0	5	0	0	0	0	2	1						0						0				0
Case 894	0	0	5	0	0	0	0	2	1						0						0					0
Case 895	0	0	4a	0	0	0	0	2	1						0						0				0
Case 896	0	0	4a	0	0	0	0	2	1											0	0								0
Case 897	0	1	4a	0	0	0	0	2	1						0						0							0
Case 898	0	0	4b	0	0	0	0	2	1						0						0					0
Case 899	0	0	4b	1	0	0	0	2	1						0					0	0								0
Case 900	0	0	4b	0	0	0	0	2	1											0	0												0
Case 901	0	0	4b	0	0	0	0	2	1						0						0			0
Case 902	0	0	4b	1	0	0	0	2	1						0						0				0
Case 903	1	0	4b	0	0	0	0	2	1											0	0					0
Case 904	1	0	4b	0	0	0	0	2	1						0						0							0
Case 905	0	0	4b	0	0	0	0	2	1											0	0								0
Case 906	0	0	4b	0	0	0	0	2	1											0	0										0
Case 907	0	1	4c	0	0	0	0	2	1											0	0										0
Case 908	1	1	4c	0	0	0	0	2	1						0						0			0
Case 909	1	0		0	0	0	0	2	1						0						0				0
Case 910	0	0		0	0	0	0	2	1											0	0			0
Case 911	1	0		0	0	0	0	2	1											0	0									0
Case 912	0	0		0	0	0	0	2	1						0						0					0
Case 913	1	0		0	0	0	0	2	1						0						0				0
Case 914	1	0		0	0	0	0	2	1											0	0			0
Case 915	1	0		0	0	0	0	2	1											0	0								0
Case 916	0	0		0	0	0	0	2	1						0						0
Case 917	0	1		0	0	0	0	2	1											0	0									0
Case 918	0	1		0	0	0	0	2	1						0						0				0
Case 919	0	1		1	0	0	0	2	1						0					0	0					0
Case 920	1	0	4b	0	1	1	0	2	2	2							0			0	0									0
Case 921	1	0	4b	0	1	1	0	2	2	2							0			0	0									0
Case 922	0	0	4b	0	1	1	0	2	2	2					0		0			0	0												0
Case 923	1	0	4c	0	1	1	0	2	2	2							0			0	0												0
Case 924	1	1		0	0	1	0	2	2	2		0	0		0						0			0
Case 925	0	0	5	0	1	1	0	2	1											0	0												0
Case 926	1	0	5	1	1	1	0	2	1						0					0	0
Case 927	0	0	5	0	1	1	0	2	1											0	0												0
Case 928	1	0	5	0	1	1	0	2	1											0	0												0
Case 929	0	0	5	0	1	1	0	2	1											0	0								0
Case 930	1	1	5	1	1	1	0	2	1						0					0	0			0
Case 931	0	1	5	0	1	1	0	2	1											0	0								0
Case 932	0	0	5	0	1	1	0	2	1											0	0										0
Case 933	0	0	4a	0	1	1	0	2	1											0	0												0
Case 934	0	0	4a	0	1	1	0	2	1						0						0					0
Case 935	0	0	4a	0	1	1	0	2	1						0						0
Case 936	0	0	4a	0	1	1	0	2	1											0	0												0
Case 937	1	0	4a	1	1	1	0	2	1						0					0	0					0
Case 938	0	0	4a	0	1	1	0	2	1											0	0							0
Case 939	1	0	4b	0	1	1	0	2	1											0	0												0
Case 940	0	0	4b	1	1	1	0	2	1						0					0	0							0
Case 941	0	0	4b	0	1	1	0	2	1						0					0	0							0
Case 942	0	0	4b	0	1	1	0	2	1											0	0									0
Case 943	0	0	4b	1	1	1	0	2	1						0					0	0				0
Case 944	0	0	4b	0	1	1	0	2	1											0	0										0
Case 945	0	0	4b	0	1	1	0	2	1											0	0
Case 946	1	0	4b	0	1	1	0	2	1						0						0							0
Case 947	0	0	4b	0	1	1	0	2	1											0	0									0
Case 948	0	0	4b	0	1	1	0	2	1						0						0							0
Case 949	0	0	4b	0	1	1	0	2	1						0						0			0
Case 950	0	1	4b	0	1	1	0	2	1						0						0										0
Case 951	0	1	4b	1	1	1	0	2	1						0						0							0
Case 952	0	0	4b	0	1	1	0	2	1						0						0							0
Case 953	0	0	4c	0	1	1	0	2	1						0						0							0
Case 954	0	0	4c	0	1	1	0	2	1						0						0							0
Case 955	0	0	4c	0	1	1	0	2	1											0	0												0
Case 956	0	1	4c	0	1	1	0	2	1						0						0					0
Case 957	0	0		0	1	1	0	2	1						0					0	0												0
Case 958	0	0		1	1	1	0	2	1						0					0	0					0
Case 959	1	1		0	1	1	0	2	1						0						0							0
Case 960	1	0	5	0	0	1	0	2	1											0	0										0
Case 961	0	1	5	0	0	1	0	2	1											0	0												0
Case 962	1	0	4b	0	0	1	0	2	1											0	0										0
Case 963	0	0	4c	0	0	1	0	2	1						0						0							0
Case 964	0	0	4c	0	0	1	0	2	1											0	0								0
Case 965	0	0		0	0	1	0	2	1											0	0								0

## Sheet: Benign tumors
Patients	gender	≥55 years	TI-RADs
1	0	1	0
2	0	0	2
3	0	1	4
4	1	0	3
5	0	0	1
6	0	0	1
7	0	0	0
8	0	0	0
9	0	1	3
10	1	0	2
11	0	1	2
12	0	0	0
13	0	0	0
14	0	1	0
15	0	0	1
16	0	0	0
17	0	0	2
18	0	0	3
19	0	0	0
20	0	1	3
21	0	0	2
22	1	0	2
23	0	0	1
24	0	0	1
25	0	0	1
26	0	1	1
27	0	0	0
28	0	0	1
29	0	0	0
30	1	1	1
31	0	0	1
32	0	0	2
33	0	1	0
34	0	0	2
35	0	0	2
36	1	0	1
37	0	1	2
38	0	1	1
39	0	0	3
40	1	0	0
41	0	1	0
42	0	0	3
43	1	1	1
44	0	0	1
45	1	1	1
46	1	0	3
47	0	0	2
48	0	0	1
49	0	0	3
50	0	1	3
51	0	0	0
52	1	1	2
53	0	0	0
